# Supplementary material for: The Taxonomic and Phylogenetic Affinities of Bunopithecus sericus, a Fossil Hylobatid from the Pleistocene of China
Source: PLOS journal article supplement (doi:10.1371/journal.pone.0131206), 2015-07-08
Supplement: S4 (10.1371/journal.pone.0131206.s004) [file journal.pone.0131206.s004]

**S4 Table. Average pair-wise Mahalanobis distances for each DFA.**Distances based on absolute variables in  $M_2$  (see also Fig. 3):

|                     | <i>Bunopithecus</i> | <i>Hoolock</i> | <i>Hylobates</i> | <i>Nomascus</i> | <i>Symphalangus</i> |
|---------------------|---------------------|----------------|------------------|-----------------|---------------------|
| <i>Hoolock</i>      | 1.203213615         | 1.268151397    | -                | -               | -                   |
| <i>Hylobates</i>    | 1.251276987         | 1.360384112    | 1.237795975      | -               | -                   |
| <i>Nomascus</i>     | 1.303326294         | 1.305947403    | 1.248540015      | 1.190138860     | -                   |
| <i>Symphalangus</i> | 1.494418333         | 1.574835503    | 1.567737094      | 1.507862728     | 1.608609493         |

Distances based on absolute variables in  $M_3$  (see also Fig. 4):

|                     | <i>Bunopithecus</i> | <i>Hoolock</i> | <i>Hylobates</i> | <i>Nomascus</i> | <i>Symphalangus</i> |
|---------------------|---------------------|----------------|------------------|-----------------|---------------------|
| <i>Hoolock</i>      | 1.315880909         | 1.382754945    | -                | -               | -                   |
| <i>Hylobates</i>    | 1.310389158         | 1.348998834    | 1.208561150      | -               | -                   |
| <i>Nomascus</i>     | 1.361359375         | 1.337043531    | 1.238605232      | 1.235676367     | -                   |
| <i>Symphalangus</i> | 1.528910450         | 1.612534515    | 1.599679379      | 1.577355644     | 1.720434874         |

Distances based on absolute variables in  $M_{2-3}$  (see also Fig. 5):

|                     | <i>Bunopithecus</i> | <i>Hoolock</i> | <i>Hylobates</i> | <i>Nomascus</i> | <i>Symphalangus</i> |
|---------------------|---------------------|----------------|------------------|-----------------|---------------------|
| <i>Hoolock</i>      | 1.396336667         | 1.348071944    | -                | -               | -                   |
| <i>Hylobates</i>    | 1.400498654         | 1.361070252    | 1.305148483      | -               | -                   |
| <i>Nomascus</i>     | 1.433930625         | 1.346777958    | 1.304851618      | 1.275286792     | -                   |
| <i>Symphalangus</i> | 1.573886667         | 1.546036543    | 1.535476158      | 1.512375451     | 1.655666471         |

Distances based on shape variables in  $M_{2-3}$  (see also Fig. 6):

|                     | <i>Bunopithecus</i> | <i>Hoolock</i> | <i>Hylobates</i> | <i>Nomascus</i> | <i>Symphalangus</i> |
|---------------------|---------------------|----------------|------------------|-----------------|---------------------|
| <i>Hoolock</i>      | 1.298866667         | 1.287508361    | -                | -               | -                   |
| <i>Hylobates</i>    | 1.413944808         | 1.366397288    | 1.405202258      | -               | -                   |
| <i>Nomascus</i>     | 1.414656875         | 1.339523958    | 1.375278225      | 1.317103217     | -                   |
| <i>Symphalangus</i> | 1.385725556         | 1.396725796    | 1.441401381      | 1.403067344     | 1.431606876         |
